# Supplementary material
Source: PubMed Central journal article supplement (PMC3176971)
Supplement: NIHMS316142-supplement-5.pdf [file NIHMS316142-supplement-5.pdf]

## A

### Normalized to Total Protein (Log<sub>10</sub>)

Plate Layout Method: As suggested by Manufacturer  
 Calibration Method: Standard Curve  
 Analysis Software: Excel and Genepattern  
 Clustering Method: Pairwise Average-Linkage  
 Row and Column Distance Measure: Euclidean  
 Row and Column Center: Subtract the Median of Each

Salivary  
**SUPERNATANT**

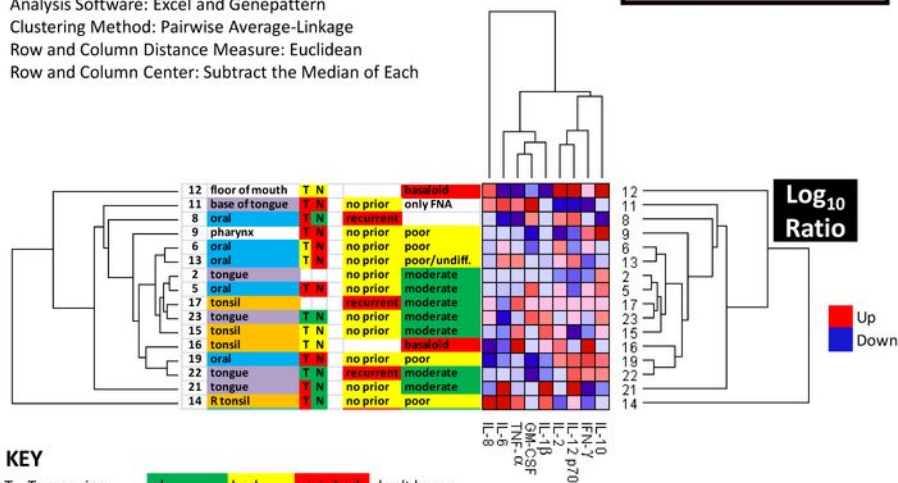

### KEY

T = Tumor size  
 N = Nodes  
 M = Metastasis  
 Differentiation

|          |      |          |            |
|----------|------|----------|------------|
| ok       | bad  | very bad | don't know |
| ok       | bad  | very bad | don't know |
|          |      | very bad | don't know |
| moderate | poor | basaloid | don't know |

## B

### Normalized to Total Protein (Log<sub>10</sub>)

Plate Layout Method: As suggested by Manufacturer  
 Calibration Method: Standard Curve  
 Analysis Software: Excel and Genepattern  
 Clustering Method: Pairwise Average-Linkage  
 Row and Column Distance Measure: Euclidean  
 Row and Column Center: Subtract the Median of Each

Salivary Cell  
**PELLET**

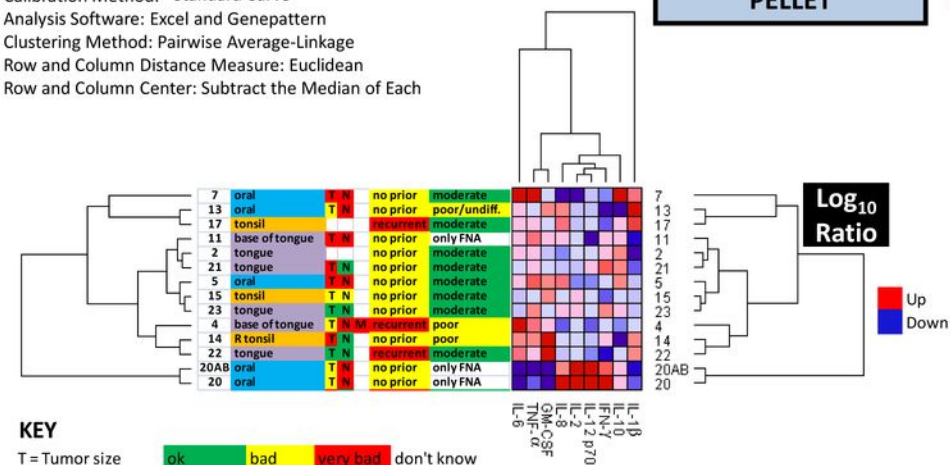

### KEY

T = Tumor size  
 N = Nodes  
 M = Metastasis  
 Differentiation

|          |      |          |            |
|----------|------|----------|------------|
| ok       | bad  | very bad | don't know |
| ok       | bad  | very bad | don't know |
|          |      | very bad | don't know |
| moderate | poor | basaloid | don't know |
