# Supplementary material
Source: PubMed Central journal article supplement (PMC3176971)
Supplement: NIHMS316142-supplement-6.pdf [file NIHMS316142-supplement-6.pdf]

# T-test: The effect of cancer recurrence on the response to curcumin

## Supernatant

| Analyte       | p-Value      | Recurrent |          |          |          |          | No Prior |          |          |          |          |          |          |          |          |  |
|---------------|--------------|-----------|----------|----------|----------|----------|----------|----------|----------|----------|----------|----------|----------|----------|----------|--|
|               |              | 8         | 17       | 22       | 2        | 5        | 6        | 9        | 11       | 13       | 14       | 15       | 19       | 21       | 23       |  |
| GM-CSF        | <b>0.699</b> | -0.17336  | -0.0215  | -0.24836 | -0.3015  | 0.043687 | -0.25045 | -0.26651 | 1.016163 | 0.234776 | -0.03687 | -0.23217 | -0.32891 | -0.41766 | -0.03356 |  |
| IFN- $\gamma$ | <b>0.652</b> | -0.26604  | -0.01485 | 0.10528  | -0.40806 | -0.12518 | -0.05017 | 0.101609 | 0.321715 | 0.048678 | -0.24154 | -0.38213 | 0.171289 | -0.69627 | -0.32408 |  |
| IL-10         | <b>0.300</b> | -1.11592  | -0.13825 | 0.028118 | -0.24743 | -0.09661 | -0.32323 | 0.276603 | 0.569497 | 0.005002 | -0.17229 | -0.25327 | -0.07537 | -0.83381 | -0.17493 |  |
| IL-12 p70     | <b>0.409</b> | -0.08945  | -0.12674 | 0.147396 | -0.58861 | -0.42787 | -0.34826 | -0.38558 | 0.336975 | 0.329463 | -0.04831 | -0.65788 | -0.03502 | -0.09046 | -0.23194 |  |
| IL-1 $\beta$  | <b>0.355</b> | -0.32613  | -0.11033 | -0.30266 | -0.40829 | -0.27171 | -0.24139 | -0.22205 | 0.575482 | 0.033832 | 0.236153 | -0.00391 | -0.45339 | 0.090266 | -0.12042 |  |
| IL-2          | <b>0.540</b> | -0.09086  | -0.06259 | -0.06619 | -0.49653 | -0.16538 | 0.044816 | -0.61995 | 0.247836 | 0.270977 | -0.31002 | -0.21854 | -0.0247  | -0.43647 | -0.30259 |  |
| IL-6          | <b>0.326</b> | -0.51201  | -0.24997 | -0.0559  | -0.34423 | -0.26079 | -0.05799 | -0.09009 | 1.113613 | 0.388628 | 0.522087 | -0.35179 | -0.29581 | 0.18249  | -0.49359 |  |
| IL-8          | <b>0.742</b> | -0.24174  | 0.030067 | -0.15975 | -0.2811  | -0.22576 | -0.20934 | -0.12667 | 1.024407 | 0.099941 | 1.345546 | -0.37196 | -0.61392 | -0.62037 | 0.010512 |  |
| TNF- $\alpha$ | <b>0.683</b> | -0.51364  | 0.114418 | -0.08529 | -0.3239  | -0.23634 | -0.16148 | -0.15302 | 0.779255 | 0.33137  | 0.161388 | -0.13621 | -0.23565 | -0.45595 | -0.29433 |  |

## Pellet

| Analyte       | p-Value      | Recurrent |          |          |          |          | No Prior |          |          |          |          |          |          |          |          |  |
|---------------|--------------|-----------|----------|----------|----------|----------|----------|----------|----------|----------|----------|----------|----------|----------|----------|--|
|               |              | 4         | 17       | 22       | 2        | 5        | 7        | 11       | 13       | 14       | 15       | 20AB     | 20       | 21       | 23       |  |
| GM-CSF        | <b>0.458</b> | -0.67243  | -0.37431 | -0.36441 | -0.54059 | 0.052956 | -0.87009 | 0.651697 | -0.55968 | 0.556922 | 0.197314 | -0.74927 | -0.78504 | -0.02426 | -0.36913 |  |
| IFN- $\gamma$ | <b>0.059</b> | -0.86471  | -0.6726  | -1.49527 | -0.38047 | -0.24358 | -1.14193 | 0.453923 | -1.31728 | -0.20414 | -0.37665 | 0.321044 | 0.613735 | 0.449448 | -0.28528 |  |
| IL-10         | <b>0.073</b> | -1.03618  | -0.34898 | -1.11121 | -0.2942  | 0.024244 | -0.28113 | 0.540841 | -1.2915  | -0.78785 | -0.06952 | 0.020805 | -0.05801 | 0.102098 | -0.38022 |  |
| IL-12 p70     | <b>0.061</b> | -1.0614   | -0.36966 | -1.16321 | -0.39471 | -0.30518 | -0.88803 | -0.01563 | -0.85353 | -0.28989 | 0.031955 | 0.919096 | 0.750358 | 0.125572 | -0.42172 |  |
| IL-1 $\beta$  | <b>0.567</b> | -0.41967  | 1.860536 | -0.05928 | -1.29963 | 0.121497 | 0.641342 | -0.06594 | 1.895878 | 0.9986   | 0.279794 | -0.61259 | -0.34257 | -0.31068 | -0.13877 |  |
| IL-2          | <b>0.147</b> | -0.76449  | -0.45235 | -0.98541 | -0.45215 | -0.28388 | -1.37621 | 0.480487 | -0.83155 | -0.2151  | 0.137881 | 0.667036 | 0.667837 | -0.05302 | -0.33181 |  |
| IL-6          | <b>0.463</b> | 0.675976  | -0.15608 | -0.37493 | -0.33448 | -0.02723 | 0.77647  | 0.760497 | -0.51053 | 0.165627 | -0.45824 | -1.71696 | -1.51938 | -0.03864 | -0.71348 |  |
| IL-8          | <b>0.170</b> | -1.08501  | 0.150274 | -1.04605 | -0.54852 | 0.3767   | -1.39441 | 0.709174 | -0.47577 | -0.15569 | 0.138306 | 0.347259 | 0.754371 | -0.07981 | -0.26161 |  |
| TNF- $\alpha$ | <b>0.152</b> | -0.70433  | -0.3388  | -1.00903 | -0.43054 | 0.063594 | -0.50557 | 0.614602 | -0.81188 | -0.17644 | -0.05592 | -0.77438 | -0.59993 | -0.00121 | -0.37695 |  |
