# Supplementary material
Source: PubMed Central journal article supplement (PMC3176971)
Supplement: NIHMS316142-supplement-7.pdf [file NIHMS316142-supplement-7.pdf]

## Supplementary Data

**Figure 1.** Clustering of tumor types. A, The salivary supernatant  $\log_{10}$  ratio analysis shows clustering of oral cancers (Tumors 6 and 13) in the salivary supernatant. Here the moderately differentiated tumors cluster as well. B, the cellular pellet  $\log_{10}$  ratio shows clustering of tongue tumors (samples 2, 11, and 21), all three with no prior case of tumor. There is also clustering of IL-10, IFN- $\gamma$ , IL-12p70 and IL-2 as a group, and that of GM-CSF and TNF- $\alpha$  as another group in the cluster analysis.

**Figure 2.** Inhibitory effect of curcumin in recurrent tumors. Cluster analysis was performed on four recurrent tumors and ten tumors without the previous history of tumor. The results show statistically significant inhibitory effect on the expression of IL-10, IFN- $\gamma$ , IL-12p70 in the salivary cellular pellets of recurrent tumors.
